# Supplementary material for: Association between estimated glucose disposal rate and 28-day mortality in patients with sepsis: analysis of the MIMIC‑IV database
Source: Research Square preprint supplement (doi:10.21203/rs.3.rs-6816578/v1), 2025-07-10
Supplement: Supplementary file 1 [file 85ce3fe0e0d50a2746348873.docx]

| Characteristics | Total (n = 672) | T1 (N = 224) | T2 (N = 224) | T3(N = 224) | *P* value |
| --- | --- | --- | --- | --- | --- |
| Demographic |  |  |  |  |  |
| Sex, n (%) |  |  |  |  | 0.141 |
| Female | 281 (41.1) | 105 (46.1) | 83 (37.1) | 93 (40.1) |  |
| Male | 403 (58.9) | 123 (53.9) | 141 (62.9) | 139 (59.9) |  |
| Race/ethnicity,n (%) |  |  |  |  | 0.353 |
| Asian people | 93 (13.8) | 25 (11.2) | 39 (17.4) | 29 (12.9) |  |
| Black people | 188 (28.0) | 61 (27.2) | 63 (28.1) | 64 (28.6) |  |
| White people | 391 (58.2) | 138 (61.6) | 122 (54.5) | 131 (58.5) |  |
| Age (years） | 65.3 ± 15.6 | 64.7 ± 15.3 | 64.9 ± 15.8 | 66.2 ± 15.9 | 0.529 |
| Heart rate (times) | 105.2 ± 20.8 | 105.6 ± 21.1 | 102.5 ± 19.0 | 107.5 ± 22.0 | 0.036 |
| Systolic blood pressure (mmHg) | 94.6 ± 17.4 | 94.6 ± 17.1 | 95.5 ± 18.0 | 93.6 ± 17.2 | 0.491 |
| Resp rate (times) | 28.1 ± 6.2 | 27.4 ± 5.6 | 27.7 ± 6.3 | 29.2 ± 6.4 | 0.004 |
| BMI | 28.8 ± 6.9 | 32.9 ± 8.4 | 29.6 ± 4.9 | 24.0 ± 3.0 | < 0.001 |
| SOFA score | 3.2 ± 1.7 | 3.2 ± 1.6 | 2.9 ± 1.5 | 3.4 ± 1.9 | 0.009 |
| APSIII score | 53.7 ± 23.3 | 54.3 ± 22.0 | 52.9 ± 23.7 | 53.9 ± 24.1 | 0.786 |
| SAPII score | 37.4 ± 12.9 | 37.1 ± 13.1 | 37.1 ± 12.6 | 38.0 ± 13.0 | 0.709 |
| OASIS score | 35.2 ± 8.8 | 35.3 ± 8.7 | 34.5 ± 8.7 | 35.9 ± 9.1 | 0.27 |
| 28-day mortality, n (%) | 129 (18.9) | 30 (13.2) | 46 (20.5) | 53 (22.8) | 0.022 |
| Laboratory tests |  |  |  |  |  |
| eGDR（mg/kg/min） | 7.9 ± 2.4 | 5.1 ± 1.6 | 8.3 ± 0.7 | 10.3 ± 0.6 | < 0.001 |
| HbA1c（%） | 6.6 ± 2.0 | 7.9 ± 2.8 | 6.3 ± 1.2 | 5.7 ± 0.6 | < 0.001 |
| Glucose (mg/dL) | 155.1 ± 57.1 | 173.6 ± 62.3 | 152.3 ± 58.1 | 139.5 ± 44.5 | < 0.001 |
| Sodium（mEq/L） | 141.0 ± 5.4 | 140.6 ± 5.7 | 141.2 ± 4.8 | 141.2 ± 5.8 | 0.422 |
| Potassium（mEq/L） | 4.6 ± 0.9 | 4.6 ± 1.0 | 4.7 ± 1.0 | 4.6 ± 0.8 | 0.475 |
| Chloride（mg/L） | 103.6 ± 5.9 | 103.2 ± 6.0 | 103.9 ± 5.9 | 103.7 ± 5.9 | 0.388 |
| Bicarbonate（mmol/L） | 22.6 ± 4.6 | 22.6 ± 4.8 | 22.3 ± 4.9 | 22.7 ± 4.2 | 0.649 |
| AG（mmol/L） | 15.7 ± 4.2 | 16.2 ± 4.3 | 15.6 ± 4.5 | 15.3 ± 3.8 | 0.067 |
| BE | -1.7 ± 5.1 | -1.6 ± 5.6 | -2.1 ± 5.5 | -1.5 ± 4.1 | 0.548 |
| MCV (fl) | 91.0 ± 7.2 | 89.7 ± 7.0 | 91.2 ± 7.0 | 92.1 ± 7.3 | 0.002 |
| MCHC（g/L） | 32.9 ± 1.7 | 33.1 ± 1.7 | 32.8 ± 1.5 | 32.9 ± 1.7 | 0.081 |
| LAC（mmol/L） | 2.1 ± 1.8 | 2.1 ± 1.4 | 2.4 ± 2.4 | 1.9 ± 1.3 | 0.038 |
| RDW（%） | 91.0 ± 7.2 | 89.7 ± 7.0 | 91.2 ± 7.0 | 92.1 ± 7.3 | 0.002 |
| WBC (×10^9/L) | 11.2 (8.6, 15.4) | 10.9 (8.6, 14.9) | 11.4 (9.1, 15.5) | 11.2 (8.2, 15.7) | 0.576 |
| Medical History |  |  |  |  |  |
| Hypertension, n (%) | 151 (22.5) | 124 (55.4) | 26 (11.6) | 1 (0.4) | < 0.001 |
| Diabetes, n (%) | 216 (32.1) | 115 (51.3) | 60 (26.8) | 41 (18.3) | < 0.001 |
| Cerebrovascular disease, n (%) | 259 (38.5) | 73 (32.6) | 99 (44.2) | 87 (38.8) | 0.041 |

***Supplementary Material***

**Supplementary Table 1** Baseline characteristics according to eGDR Tri-sectional Quantile (Missing data were replaced with dummy variables)

**Supplementary Table 2** Multivariable cox regression to assess the association of eGDR with 28-day mortality (Missing data were replaced with dummy variables)

|  | **eGDR(n=672)** |  |  | **Tertiles of eGDR** | | | | | | | |
| --- | --- | --- | --- | --- | --- | --- | --- | --- | --- | --- | --- |
|  | **(n=672)*** |  |  | **Q1(n=224)** |  |  | **Q2(n=224)** |  |  | **Q3(n=224)** |  |
|  | **HR(95%CI)** | ***P*** |  | **HR(95%CI)** | ***P*** |  | **HR(95%CI)** | ***P*** |  | **HR(95%CI)** | ***P*** |
| **Model 1a** | 1.31 (1.05~2.51) | 0.001 |  | 1(Ref) |  |  | 1.58 (1.13~2.55) | 0.043 |  | 1.76 (1.05~1.62) | 0.001 |
| **Model 2b** | 1.29 (1.04~1.6) | 0.001 |  | 1(Ref) |  |  | 1.74 (1.11~2.72) | 0.001 |  | 1.29 (1.04~1.6) | 0.002 |
| **Model 3c** | 1.45(1.23~1.84) | 0.002 |  | 1(Ref) |  |  | 2.42 (1.43~4.3) | ＜0.001 |  | 2.41 (1.15~4.09) | 0.001 |
| **Model 4d** | 1.48(1.16~1.67) | 0.001 |  | 1(Ref) |  |  | 2.54(1.49~4.23) | 0.001 |  | 2.53(1.16~4.37) | 0.001 |

* eGDR was entered as a continuous variable

HR, Hazard Ratio

a.Model 1: unadjusted models

b.Model 2: additionally adjusted for age,sex

c. Model 3: adjusted as for model 2, additionally adjusted for race/ethnicity, sodium, chloride, bicarbonate,RDW, LAC and CRP

d. Model 4: adjusted as for model 3, additionally adjusted for SOFA score, charlson comorbidity index (CCI), cerebrovascular disease, diabetes status,and cancer

**Supplementary Table 3** Baseline characteristics according to eGDR Tri-sectional quantiles (The multiple imputation method was used. Data that had been excluded because of missing HbA1c were reincluded in the analysis)

| Characteristics | Total (n = 11117) | T1 (N = 3706) | T2 (N = 3705) | T3(N = 3706) | *P* value |
| --- | --- | --- | --- | --- | --- |
| Demographic |  |  |  |  |  |
| Sex, n (%) |  |  |  |  | 0.012 |
| Female | 4701 (42.3) | 1636 (44.1) | 1553 (41.9) | 1512 (40.8) |  |
| Male | 6416 (57.7) | 2070 (55.9) | 2152 (58.1) | 2194 (59.2) |  |
| Age (years） | 65.3 ± 16.2 | 65.8 ± 15.4 | 65.1 ± 16.2 | 65.0 ± 16.9 | 0.073 |
| Heart rate (times) | 106.0 ± 21.0 | 105.1 ± 20.3 | 106.3 ± 21.4 | 106.5 ± 21.2 | 0.006 |
| Systolic blood pressure (mmHg) | 88.9 ± 16.5 | 90.4 ± 16.9 | 88.3 ± 16.4 | 88.0 ± 16.0 | < 0.001 |
| Resp rate (times) | 28.4 ± 6.6 | 28.0 ± 6.3 | 28.5 ± 6.7 | 28.6 ± 6.7 | < 0.001 |
| BMI | 28.8 ± 7.3 | 33.3 ± 8.8 | 29.0 ± 5.4 | 23.9 ± 3.3 | < 0.001 |
| SOFA score | 3.6 ± 2.0 | 3.6 ± 2.0 | 3.6 ± 2.0 | 3.6 ± 2.0 | 0.775 |
| APSIII score | 55.0 ± 25.6 | 55.2 ± 25.1 | 55.2 ± 26.2 | 54.5 ± 25.6 | 0.418 |
| SAPII score | 39.7 ± 14.4 | 40.0 ± 14.3 | 39.8 ± 14.6 | 39.4 ± 14.4 | 0.192 |
| OASIS score | 34.9 ± 9.3 | 34.9 ± 9.4 | 34.9 ± 9.3 | 34.8 ± 9.3 | 0.781 |
| 28-day mortality, n (%) | 2118 (19.1) | 651 (17.6) | 712 (19.2) | 755 (20.4) | 0.008 |
| Laboratory tests |  |  |  |  |  |
| eGDR（mg/kg/min） | 7.8 ± 2.5 | 5.0 ± 1.7 | 8.2 ± 0.7 | 10.3 ± 0.7 | < 0.001 |
| HbA1c（%） | 6.3 ± 1.6 | 7.0 ± 2.3 | 6.1 ± 1.1 | 5.6 ± 0.6 | < 0.001 |
| Glucose (mg/dL) | 172.4 ± 102.4 | 197.8 ± 139.0 | 167.0 ± 82.6 | 152.4 ± 65.3 | < 0.001 |
| Sodium（mEq/L） | 138.5 ± 5.4 | 138.5 ± 5.6 | 138.5 ± 5.1 | 138.6 ± 5.3 | 0.719 |
| Potassium（mEq/L） | 4.2 ± 0.8 | 4.2 ± 0.8 | 4.2 ± 0.7 | 4.2 ± 0.7 | 0.97 |
| Chloride（mg/L） | 104.9 ± 6.8 | 104.8 ± 6.9 | 104.9 ± 6.6 | 105.1 ± 6.9 | 0.354 |
| Bicarbonate（mmol/L） | 22.4 ± 4.7 | 22.5 ± 4.7 | 22.3 ± 4.8 | 22.3 ± 4.7 | 0.291 |
| AG（mmol/L） | 14.8 ± 4.7 | 15.0 ± 4.7 | 14.8 ± 4.7 | 14.6 ± 4.6 | 0.004 |
| BE | 91.5 ± 7.2 | 91.2 ± 7.0 | 91.6 ± 7.2 | 91.8 ± 7.4 | 0.002 |
| MCV (fl) | 33.0 ± 1.7 | 33.0 ± 1.7 | 33.0 ± 1.7 | 33.0 ± 1.7 | 0.289 |
| MCHC（g/L） | 2.4 ± 1.9 | 2.4 ± 1.9 | 2.4 ± 1.9 | 2.4 ± 1.9 | 0.348 |
| LAC（mmol/L） | 48.7 ± 8.4 | 48.1 ± 7.9 | 48.8 ± 8.5 | 49.1 ± 8.8 | < 0.001 |
| RDW（%） | 18.0 ± 41.1 | 16.8 ± 36.2 | 18.9 ± 46.1 | 18.2 ± 40.5 | 0.08 |
| WBC (×10^9/L) | 14.8 ± 4.7 | 15.0 ± 4.7 | 14.8 ± 4.7 | 14.6 ± 4.6 | 0.004 |

**Supplementary Table 4** Interaction between diabetes status and 28-day mortality

| Diabetes | | | | | | |
| --- | --- | --- | --- | --- | --- | --- |
| 28-day mortality | | | | | | |
|  |  | n.total | n.event_% |  | *P* value | *P* for interaction |
| No | T1 | 141 | 10 (7.1) | reference |  | 0.895 |
| T2 | 154 | 30 (19.5) | 2.99 (1.46~6.12) | 0.003 |
| T3 | 160 | 32 (20) | 3.03 (1.49~6.16) | 0.002 |
| * | 455 | 72 (15.8) | 1.56 (1.16~2.1) | 0.003 |
| Yes | T1 | 83 | 10 (12) | reference |  |
| T2 | 69 | 18 (26.1) | 2.41 (1.11~5.22) | 0.026 |
| T3 | 65 | 17 (26.2) | 2.39 (1.1~5.23) | 0.028 |
| * | 217 | 45 (20.7) | 1.49 (1.04~2.13) | 0.028 |

* eGDR was entered as a continuous variable
